# Supplementary material for: Mimicking Metastases Including Tumor Stroma: A New Technique to Generate a Three-Dimensional Colorectal Cancer Model Based on a Biological Decellularized Intestinal Scaffold
Source: PubMed Central journal article supplement — Tissue Eng Part C Methods. 2016 Jun 2;22(7):621–35. doi: 10.1089/ten.tec.2015.0557 (PMC4943469; doi:10.1089/ten.tec.2015.0557), 2016-06-02
Supplement: Suppl_Figure1.pdf [file Suppl_Figure1.pdf]

## Supplementary Data

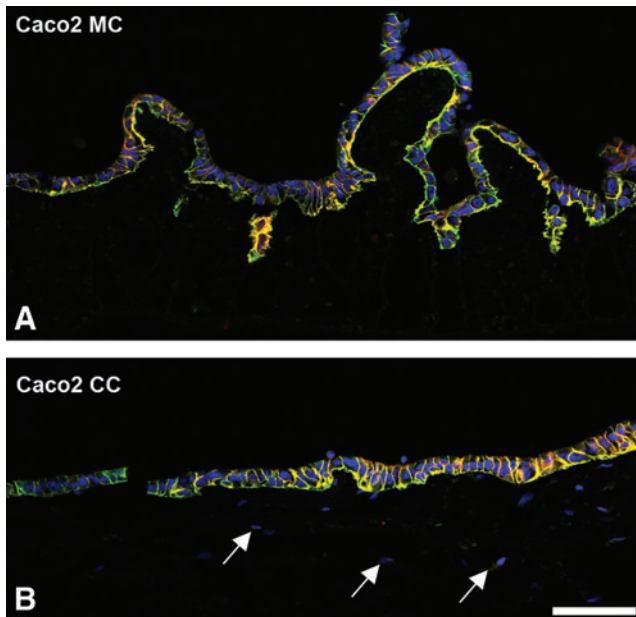

**SUPPLEMENTARY FIG. S1.** E-cadherin as well as  $\beta$ -catenin expression is not changed in Caco2 cells under 3D culture conditions. E-cadherin (*green*) and  $\beta$ -catenin (*red*) are colocalized (*yellow*) in Caco2 cells cultured on the SISmuc in monoculture (**A**) and in coculture with fibroblasts (*arrows*) (**B**). Scale bar in **B**: 75  $\mu$ m for (**A**, **B**).
