# Supplementary material for: Mimicking Metastases Including Tumor Stroma: A New Technique to Generate a Three-Dimensional Colorectal Cancer Model Based on a Biological Decellularized Intestinal Scaffold
Source: PubMed Central journal article supplement — Tissue Eng Part C Methods. 2016 Jun 2;22(7):621–35. doi: 10.1089/ten.tec.2015.0557 (PMC4943469; doi:10.1089/ten.tec.2015.0557), 2016-06-02
Supplement: Suppl_Figure2.pdf [file Suppl_Figure2.pdf]

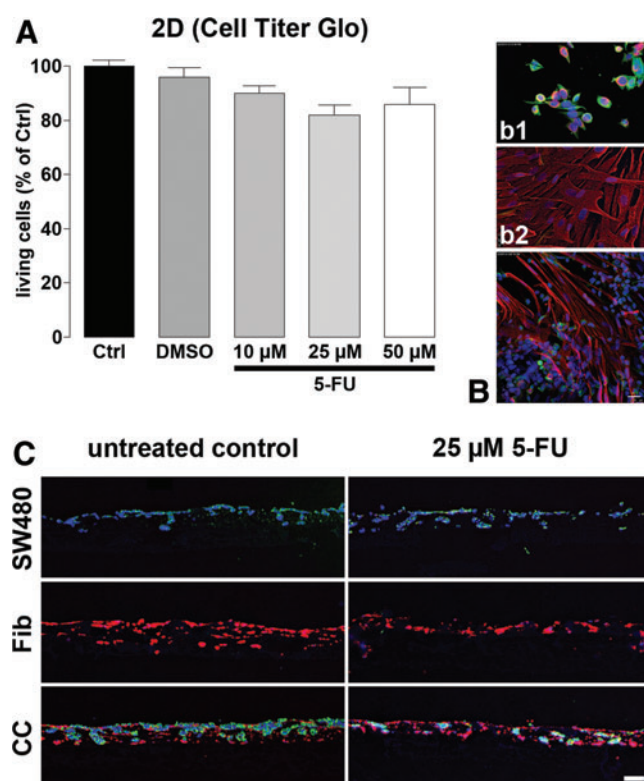

**SUPPLEMENTARY FIG. S2.** Testing of 5-FU in 2D SW480 monocultures and in 3D in mono- and coculture settings. SW480 cells are not sensitive to treatment with 5-FU in 2D (**A**). In 2D, coculture of the same amount of SW480 cells and fibroblasts leads to a fibroblast monolayer with isolated tumor cells placed on top (**B**, **b1**: SW480 monoculture, **b2**: fibroblast monoculture, PCK (*green*)/vimentin (*red*)). In contrast to 3D coculture, no tumor cell aggregates are built in 2D coculture (**B**). Under static 3D culture conditions, monocultures of tumor cells and fibroblasts (Fib) were not influenced by 5-FU, whereas in coculture, tumor aggregates were smaller and tumor cell numbers were reduced after 5-FU treatment (**C**). Ctrl = control. Scale bar in **B**: 25  $\mu$ m, Scale bar in **C**: 100  $\mu$ m. PCK, Pan-cytokeratin.
